# Supplementary material for: Effect of Xinyue capsules on patients with coronary heart disease after percutaneous coronary intervention: study protocol for a randomized controlled trial
Source: Springer Nature journal article supplement (doi:10.1186/s13063-016-1531-x), 2016-08-18
Supplement: MOESM1 [file 10598180]

## **Institutional review board of 25 participating centers**

1. Xiyuan Hospital of China Academy of Chinese Medical Sciences;
2. Beijing An Zhen Hospital of the Capital University of Medical Sciences;
3. Second Artillery General Hospital of people's Liberation Army China;
4. Dongzhimen Hospital, Beijing University of Chinese Medicine;
5. Navy General Hospital of PLA,
6. Beijing Hospital of Capital Medical University;
7. Xia men hospital of TCM;
8. Haici Hospital of Medical College of Qiingdao University;
9. The First Hospital of Changchun University of TCM;
- 10.The 309th hospital of PLA
11. The first people's Hospital of Yunnan Province
- 12.GuangDong Province Hospital Of Traditional Chinese Medicine,
13. Luoyang Central Hospital
- 14.The hospital of TCM of Xinjiang Uygur Autonomous Region
- 15.The hospital of Gansu College of Traditional Chinese Medicine
- 16.Wuxi Hospital of traditional Chinese Medicine
- 17.Hebei Cangzhou Hospital of integrated traditional Chinese and Western Medicine
- 18.The First Hospital of Henan University of Traditional Chinese Medicine,
- 19.Henan Anyang People's Hospital,
- 20 The First Hospital of Hunan University of Chinese Medicine
- 21.Xuzhou Hospital of Traditional Chinese Medicine,
- 22.Shuguang Hospital of Shanghai University of Traditional Chinese Medicine,
- 23.The Hospital of Medical College of Qiingdao University
24. the Hospital of Guiyang Medical College.
25. The First Hospital of Yanbian University
